# Supplementary material for: Downregulated annexin A1 expression correlates with poor prognosis, metastasis, and immunosuppressive microenvironment in Ewing’s sarcoma
Source: publisher site journal article supplement (doi:10.18632/aging.204615), 2023-03-28
Supplement: Supplementary file [file aging-v15i6-204615-supplementary-material-SD2.pdf]

## SUPPLEMENTARY TABLES

**Supplementary Table 1. The results of 64 genes were screened by Cox regression analysis.**

| <b>Id</b> | <b>HR</b> | <b>HR.95Low</b> | <b>HR.95High</b> | <b>P value</b> |
|-----------|-----------|-----------------|------------------|----------------|
| SSR4P1    | 0.0946393 | 0.0253896       | 0.3527656        | 0.0004446      |
| BTD       | 0.1668399 | 0.0585303       | 0.475575         | 0.0008063      |
| CFI       | 2.784123  | 1.5546975       | 4.9857549        | 0.0005724      |
| ATE1      | 0.2609063 | 0.119842        | 0.5680153        | 0.0007121      |
| 8-Mar     | 0.2054615 | 0.0876747       | 0.4814893        | 0.0002705      |
| DNAJB12   | 0.0240698 | 0.0027312       | 0.2121219        | 0.0007894      |
| OR1L1     | 0.0524297 | 0.009376        | 0.2931806        | 0.0007878      |
| NFASC     | 5.8062737 | 2.3898553       | 14.106634        | 0.0001029      |
| NUMB      | 0.1843926 | 0.0712345       | 0.4773054        | 0.0004938      |
| HMGCS1    | 2.4803271 | 1.4925393       | 4.1218495        | 0.000456       |
| SLC11A2   | 6.3468759 | 2.1559216       | 18.68474         | 0.0007953      |
| ANXA1     | 0.4654845 | 0.3108985       | 0.6969341        | 0.0002046      |
| CTSC      | 1.8600218 | 1.2947126       | 2.6721612        | 0.0007872      |
| CHN1      | 1.9746884 | 1.3864601       | 2.812482         | 0.0001627      |
| CTPS1     | 4.8559463 | 2.1468725       | 10.983519        | 0.0001479      |
| INHA      | 0.2915138 | 0.1628967       | 0.5216821        | 3.30E-05       |
| KCNS3     | 2.3154706 | 1.4402569       | 3.7225332        | 0.0005283      |
| MAP2      | 1.7018774 | 1.241727        | 2.332547         | 0.0009461      |
| PSMA7     | 6.7942523 | 2.3111685       | 19.973388        | 0.0004964      |
| RBMS2     | 0.2031346 | 0.0906346       | 0.4552746        | 0.0001084      |
| BEST1     | 4.293332  | 2.110563        | 8.733546         | 5.78E-05       |
| MARS      | 5.051995  | 2.2224331       | 11.484104        | 0.0001106      |
| SLC20A1   | 3.3130711 | 1.6815334       | 6.5276373        | 0.0005363      |
| DNAJC4    | 0.0985114 | 0.0271812       | 0.3570295        | 0.0004192      |
| ATP8B1    | 0.6241602 | 0.4780785       | 0.8148786        | 0.0005306      |
| NFYB      | 2.5735752 | 1.5496411       | 4.2740796        | 0.0002598      |
| CHL1      | 1.5858409 | 1.2146507       | 2.0704645        | 0.0007009      |
| EIF2D     | 0.0662968 | 0.0164734       | 0.2668104        | 0.0001336      |
| ZHX2      | 0.2079355 | 0.085234        | 0.5072762        | 0.0005574      |
| YTHDF2    | 9.4767684 | 2.5705217       | 34.938098        | 0.0007296      |
| KIF21B    | 2.1792797 | 1.3965846       | 3.4006245        | 0.0006007      |
| PDPR      | 0.2766747 | 0.1417277       | 0.5401123        | 0.0001667      |
| NETO2     | 1.9259348 | 1.4275289       | 2.5983536        | 1.79E-05       |
| FAM63A    | 0.1917146 | 0.0726714       | 0.5057627        | 0.000846       |
| H2AFY2    | 0.5248026 | 0.3617387       | 0.761372         | 0.0006838      |
| DDX55     | 10.282556 | 3.2278459       | 32.75589         | 8.07E-05       |
| CLSPN     | 2.6456275 | 1.5176065       | 4.6120946        | 0.0006013      |
| AUNIP     | 5.2853782 | 2.6188816       | 10.666852        | 3.37E-06       |
| ADIPOR2   | 14.145382 | 3.0340257       | 65.949288        | 0.0007436      |
| ACTR5     | 15.301172 | 3.2723971       | 71.545673        | 0.0005274      |
| KIAA0226L | 1.7733205 | 1.2643501       | 2.4871794        | 0.0009037      |
| TET1      | 0.2975943 | 0.1634802       | 0.5417316        | 7.32E-05       |
| NBR1      | 0.1905661 | 0.0787456       | 0.4611745        | 0.0002365      |
| FAXDC2    | 0.224197  | 0.1146697       | 0.4383399        | 1.24E-05       |

|           |           |           |           |           |
|-----------|-----------|-----------|-----------|-----------|
| FBXL20    | 0.0994482 | 0.035282  | 0.2803108 | 1.27E-05  |
| COX15     | 0.1551205 | 0.0549719 | 0.4377209 | 0.0004301 |
| BRI3BP    | 7.1090019 | 2.4195744 | 20.887107 | 0.0003614 |
| FGD4      | 1.9144158 | 1.3700471 | 2.6750817 | 0.0001422 |
| CYB5D2    | 0.1317974 | 0.045288  | 0.3835571 | 0.0002007 |
| IL20RB    | 2.0743551 | 1.4175644 | 3.0354523 | 0.0001724 |
| APOBEC3F  | 0.2262472 | 0.1001547 | 0.5110875 | 0.0003511 |
| CDRT4     | 0.2739683 | 0.1355931 | 0.553558  | 0.0003087 |
| ZDHHC21   | 0.5290647 | 0.3717798 | 0.7528904 | 0.0004051 |
| KRTAP12-2 | 1.6354243 | 1.2517914 | 2.1366279 | 0.0003104 |
| LSMEM1    | 12.346787 | 4.5333341 | 33.627158 | 8.80E-07  |
| SUMF1     | 0.036109  | 0.0058661 | 0.2222713 | 0.0003412 |
| SLC6A15   | 1.6407141 | 1.3189495 | 2.0409749 | 8.77E-06  |
| RPS19BP1  | 5.8278403 | 2.0542064 | 16.533744 | 0.0009228 |
| E2F7      | 4.731335  | 2.2577636 | 9.9149138 | 3.83E-05  |
| SERTM1    | 0.5016163 | 0.3405438 | 0.7388738 | 0.0004804 |
| ZBTB18    | 6.0914927 | 2.6841604 | 13.824168 | 1.55E-05  |
| ANKRD18DP | 0.7070647 | 0.5772076 | 0.8661363 | 0.0008138 |
| FOXP2     | 2.8732711 | 1.8082392 | 4.5655944 | 7.93E-06  |
| CARS      | 9.8798473 | 3.3842589 | 28.842764 | 2.79E-05  |

---

**Supplementary Table 2. The results of 50 genes were further screened by survival analysis.**

| <b>Gene</b> | <b>KM</b> | <b>HR</b> | <b>HR.95Low</b> | <b>HR.95High</b> | <b>coxPvalue</b> |
|-------------|-----------|-----------|-----------------|------------------|------------------|
| ANXA1       | 0.0017564 | 0.0925683 | 0.0334393       | 0.2562527        | 4.63E-06         |
| FOXP2       | 0.0128039 | 2.8935373 | 1.8359108       | 4.5604382        | 4.71E-06         |
| LSMEM1      | 0.0060463 | 9.7600715 | 3.67649         | 25.91031         | 4.79E-06         |
| SLC6A15     | 0.003197  | 1.6474721 | 1.3263386       | 2.0463586        | 6.39E-06         |
| ZBTB18      | 0.0096835 | 6.2167395 | 2.7463182       | 14.072605        | 1.17E-05         |
| AUNIP       | 0.000659  | 4.3322096 | 2.2412261       | 8.374006         | 1.30E-05         |
| CARS        | 0.0365124 | 10.768978 | 3.6693034       | 31.605695        | 1.52E-05         |
| BEST1       | 0.0103564 | 4.3078835 | 2.204553        | 8.4179698        | 1.93E-05         |
| FAXDC2      | 0.0026379 | 0.2333351 | 0.1192799       | 0.4564497        | 2.13E-05         |
| TET1        | 0.0003299 | 0.3419903 | 0.2084827       | 0.5609932        | 2.15E-05         |
| NETO2       | 0.0046757 | 1.8102402 | 1.3520919       | 2.4236294        | 6.72E-05         |
| DDX55       | 0.0006837 | 10.72174  | 3.3290666       | 34.530912        | 7.03E-05         |
| MARS        | 0.0061805 | 5.019813  | 2.2498657       | 11.200012        | 8.14E-05         |
| INHA        | 0.0255581 | 0.3017491 | 0.1659517       | 0.5486689        | 8.58E-05         |
| E2F7        | 0.011152  | 4.1732237 | 2.0446938       | 8.517557         | 8.68E-05         |
| NFASC       | 0.0162706 | 5.5638996 | 2.3606329       | 13.113847        | 8.73E-05         |
| EIF2D       | 0.0292688 | 0.0715743 | 0.0186022       | 0.2753909        | 0.0001252        |
| C5          | 0.0142821 | 0.4790135 | 0.3282701       | 0.6989792        | 0.0001348        |
| CTPS1       | 0.0029741 | 4.6378642 | 2.0835264       | 10.32374         | 0.0001713        |
| NBR1        | 0.0044568 | 0.1883685 | 0.0785576       | 0.4516775        | 0.0001832        |
| 8-Mar       | 0.0082468 | 0.200569  | 0.0864332       | 0.4654218        | 0.0001835        |
| RBMS2       | 0.0053486 | 0.2005834 | 0.0864395       | 0.4654551        | 0.0001836        |
| PDPR        | 0.0060672 | 0.2759143 | 0.1400358       | 0.5436375        | 0.0001982        |
| CDRT4       | 0.0391983 | 0.2715201 | 0.1365126       | 0.5400464        | 0.0002023        |
| KRTAP12-2   | 0.0090707 | 1.6503582 | 1.2656646       | 2.1519777        | 0.0002157        |
| IL20RB      | 0.0058562 | 2.0682706 | 1.4029601       | 3.0490842        | 0.0002428        |
| CYB5D2      | 0.0272408 | 0.137426  | 0.0474605       | 0.3979292        | 0.0002535        |
| FGD4        | 0.0049209 | 1.819467  | 1.318601        | 2.5105853        | 0.0002689        |
| BRI3BP      | 0.0181313 | 7.0769188 | 2.45832         | 20.372767        | 0.0002864        |
| SUMF1       | 0.0046908 | 0.0354402 | 0.0056778       | 0.2212143        | 0.0003508        |
| CFI         | 0.0044534 | 2.8362982 | 1.5931671       | 5.0494309        | 0.0003963        |
| APOBEC3F    | 0.0084779 | 0.240844  | 0.109472        | 0.5298691        | 0.0004021        |
| ATE1        | 0.0023368 | 0.2528916 | 0.1177655       | 0.5430636        | 0.0004224        |
| COX15       | 0.0344881 | 0.1615047 | 0.0584243       | 0.4464543        | 0.0004408        |
| KIF21B      | 0.0080593 | 2.1930646 | 1.4136768       | 3.4021443        | 0.0004562        |
| PBLD        | 0.003586  | 0.2494869 | 0.1127873       | 0.5518685        | 0.0006091        |
| PSMA7       | 0.0339508 | 6.395707  | 2.2105609       | 18.504384        | 0.0006184        |
| NFYB        | 0.0168299 | 2.3355333 | 1.4358686       | 3.7988962        | 0.000632         |
| CHN1        | 0.0007542 | 1.7888529 | 1.2810915       | 2.4978659        | 0.0006397        |
| H2AFY2      | 0.0055528 | 0.5237169 | 0.3595369       | 0.7628685        | 0.0007507        |
| ATP8B1      | 0.0075006 | 0.6321832 | 0.4841666       | 0.8254506        | 0.0007533        |
| KCNS3       | 0.0196467 | 2.2566179 | 1.4051509       | 3.6240409        | 0.0007592        |
| FAM63A      | 0.0193894 | 0.1946105 | 0.0745663       | 0.5079135        | 0.0008257        |
| SSR4P1      | 0.0057688 | 0.1350519 | 0.0416813       | 0.4375832        | 0.0008442        |
| KIAA0226L   | 0.0346281 | 1.8031518 | 1.2754683       | 2.549147         | 0.0008458        |
| ANKRD18DP   | 0.0006898 | 0.7192489 | 0.5925809       | 0.872993         | 0.0008554        |
| BTD         | 0.0006534 | 0.1731531 | 0.0617068       | 0.4858784        | 0.0008651        |
| NUMB        | 0.0328087 | 0.2323718 | 0.0984309       | 0.5485745        | 0.0008685        |
| ASB9P1      | 0.0055941 | 4.1440697 | 1.7917938       | 9.5844253        | 0.0008897        |
| CTSC        | 0.0012302 | 1.8596511 | 1.289374        | 2.6821561        | 0.0008997        |
